# Supplementary material
Source: PubMed Central journal article supplement (PMC2836618)
Supplement: 0909364107_pnas.0909364107_SI.pdf [file 0909364107_pnas.0909364107_SI.pdf]

# Supporting Information

Sarafraz-Yazdi et al. 10.1073/pnas.0909364107

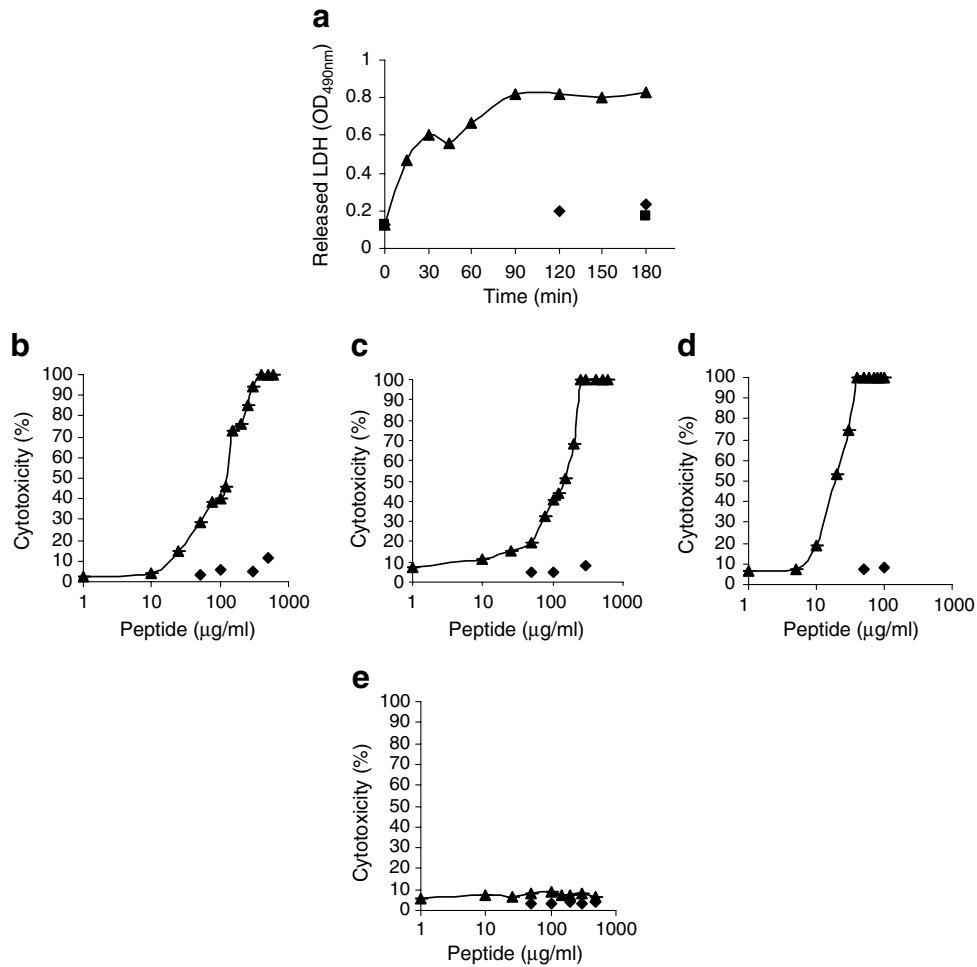

**Fig. S1.** (A) Time course for killing, as measured by the LDH assay, of MIA-PaCa-2 cells by PNC-27 (50  $\mu\text{g}/\text{mL}$ ) (Filled triangles). Filled diamonds show the effect of control peptide PNC-29 (200  $\mu\text{g}/\text{mL}$ ); the filled square shows the effect of PNC-27 on untransformed BMRPA1 cells. (B–D) Dose-response curves for killing of different cancer cell lines by PNC-27 when incubated with the cells for 30 min. Filled triangles show the effect of PNC-27; filled diamonds show the effect of control PNC-29: (B), MIA-PaCa-2; (C), TUC-3; (D), A2058; (E), untransformed human fibroblasts (AG13145). Because all errors were <5%, they are not shown on the graphs.

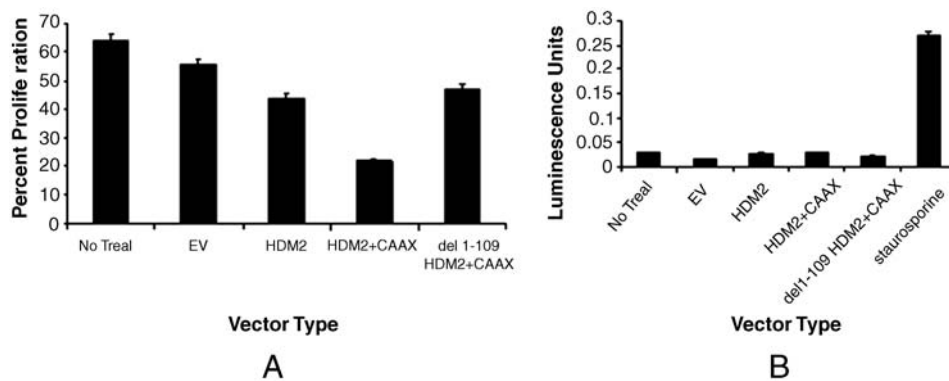

**Fig. S2.** Yazdi et al. Results of assays for: (A) MTT (cell proliferation) and (B) caspase for: control (untransfected) MCF-10-2A cells and for each of the sets of MCF-10-2A cells transfected with Precision Shuttle vectors as labeled on the abscissa. EV = empty vector; HDM-2 is overexpressed HDM-2; HDM – 2 + CAAX is full length HDM-2 with the membrane-targeting CVVK sequence on the carboxyl terminus; del1-109 HDM – 2 + CAAX is HDM-2 without its p53 (PNC-27)-binding domain, residues 1–109, attached on its C terminus to the CVVK membrane-localization sequence. Staurosporin is an agent known to induce apoptosis in cancer cells (ref. 16).
